# Supplementary material for: Development and Genome-level Microevolution of Oral Microbiome during Surface Colonization
Source: bioRxiv preprint, doi:10.1101/2025.11.07.685765, version 1 (2025-11-07)
Supplement: Supplementary Data 5 [file 685765_file16.xlsx]

## Sheet: Week1
Week 1	1_Veillonella_parvula	1_Haemophilus_parainfluenzae	1_Streptococcus_mitis	1_Streptococcus_oralis	1_Actinomyces_oris	1_Streptococcus_gordonii	1_Porphyromonas_bobii	1_Haemophilus_haemolyticus	1_Streptococcus_anginosus	1_Granulicatella_adiacens	1_Rothia_aeria	1_Prevotella_melaninogenica	1_Streptococcus_intermedius	1_Schaalia_odontolytica	1_Leptotrichia_wadei	1_Prevotella_pallens	1_Rothia_mucilaginosa	2_Neisseria_sicca	2_Neisseria_elongata	2_Lautropia_mirabilis	2_Micrococcus_luteus	2_Capnocytophaga_sputigena	2_Streptococcus_sanguinis	2_Capnocytophaga_gingivalis	2_Capnocytophaga_leadbetteri	2_Micrococcus_sp_EYE_162	2_Kingella_bonacorsii	3_Actinomyces_dentalis	3_Fusobacterium_nucleatum	3_Prevotella_oris	3_Prevotella_nigrescens	3_Actinomyces_naeslundii	3_Prevotella_denticola	3_Porphyromonas_endodontalis	3_Alloprevotella_tannerae	3_Corynebacterium_matruchotii	3_Capnocytophaga_SGB2480	3_Candidatus_Nanosynsacchari_sp_TM7_ANC_38_39_G1_1	3_Slackia_exigua	3_GGB7107_SGB10420	3_Lancefieldella_rimae	3_Parvimonas_micra	3_Selenomonas_SGB5897	3_Schaalia_meyeri	3_Stutzerimonas_stutzeri	3_Treponema_SGB69454	3_Exiguobacterium_alkaliphilum	3_Neisseria_SGB9428	3_Rothia_SGB49305
1_Veillonella_parvula	0	0	0	0	0	0	0	0	0	0	0	0	0	0	0	0	0	0	0	0	0	0	0.717544	0	0	0	0	0	0	0	0	0	0	0	0	0	0	0	0	0	0	0	0	0	0	0	0	0	0
1_Haemophilus_parainfluenzae	0	0	0	0	0	0	0	0	0	0	0	0	0	0	0	0	0	0	0	0	0	0	0	0	0	0	0	0	0	-0.753766	0	0	0	0	0	0	0	0	0	0	0	0	0	0	0	0	0	0	0
1_Streptococcus_mitis	0	0	0	0	0	0	0	0	0	0	0	0	0	0	0	0	0	0	0	0	0	0	0	0	0	0	0	0	0	0	0	0	0	0	0	0	0	0	0	0	0	0	0	0	0	0	0	0	0
1_Streptococcus_oralis	0	0.668421	0	0	0	0	0	0	0	0	0	0	0	0	0	0	0	0	0	0	0	0	0	0	0	0	0	0	0	0	0	0	0	0	0	0	0	0	0	0	0	0	0	0	0	0	0	0	0
1_Actinomyces_oris	0	0	0	0	0	0	0	-0.723251	0	0	0	0	0	0	0	0	0	0	-0.562391	0	0	0	0	0	0	0	0	0	0	0	0	0	0	0	0	0	0	0	0	0	0	0	0	0	0	0	0	0	0
1_Streptococcus_gordonii	0.656394	0	0	0	0	0	0	0	0	0	0	0	0	0	0	0	0	0	0	0	0	0	0	0	0	0	0	0	0	0	0	0	0	0	0	0	0	0	0	0	0	0	0	0	0	0	0	0	0
1_Porphyromonas_bobii	0	0	0	0	0	0	0	0	0	0	0	0	0	0	0	0	0	0	0	0	0	0	0	0	0	0	0	0	0	0	0	0	0	0	0	0	0	0	0	0	0	0	0	0	0	0	0	0	0
1_Haemophilus_haemolyticus	0	0	0.640772	0	-0.723251	0	0	0	0	0	0	0	0	0	0	0	0	0	0	0	0	0	-0.523547	0	0	0	0	-0.47417	0	0	0	-0.479778	0	0	0	0	0	0	0	0	0	0	0	0	0	0	0	0	0
1_Streptococcus_anginosus	0	-0.482909	0	0	0	0	0	0	0	0	0	0	0	0	0	0.787783	0	0	0	0	0	0	0	0	0	0	0	0	0	0.793665	0	0	0.606983	0	0	0	0	0	0	0	0	0	0	0	0	0	0	0	0
1_Granulicatella_adiacens	0.473684	0	0	0	0	0.534807	0	0	0	0	0	0	0	0	0	0	0	0	0	0	0	0	0	0	0	0	0	0	0	0	0	0	0	0	0	0	0	0	0	0	0	0	0	0	0	0	0	0	0
1_Rothia_aeria	0	0	0.550044	0	0	0	0	0	0	0	0	0	0	0	0	0	0	0	0	0.494066	0	0	0	0	0	0	0	-0.608373	0	0	0	0	0	0	0	0	0	0	0	0	0	0	0	0	0	0	0	0	0
1_Prevotella_melaninogenica	0	-0.490335	0	-0.492092	0	0	0	0	0.581046	0	0	0	0	0	0	0	0	0	0	0	0	0.464256	0	0	0	0	0	0	0	0.627459	0.513654	0	0	0	0	0	0	0	0	0	0	0	0	0	0	0	0	0	0
1_Streptococcus_intermedius	0	0	0	0	0.53794	0	0	-0.487085	0	0	0	0	0	0	0	0	0	0	0	0	0	0	0	0	0	0	0	0	0	0	0	0	0.5147	0	0	0	0	0	0	0	0	0	0	0	0	0	0	0	0
1_Schaalia_odontolytica	0	0	-0.472871	0	0	0	0	0	0	0.51944	0	0	0	0	0	0	0	0	0	0.513213	0	0	0	0	0	0	0	0	0	0	0	0	0	0	0	0	0	0	0.535958	0	0	0	0	0	0	0	0	0	0
1_Leptotrichia_wadei	0	-0.51557	-0.603716	0	0	0	0	-0.532725	0	0	-0.53338	0	0	0	0	0	0	0	0	0	0	0	0	0	0	0	0	0.871186	0	0	0	0.468808	0	0	0	0.708147	0	0.693829	0	0	0	0	0	0	0	0	0	0	0
1_Prevotella_pallens	0	-0.531913	0	0	0	0	0	0	0.787783	0	0	0.633706	0	0	0	0	0	0	0	0	0	0	0	0	0	0	-0.479707	0	0	0.750679	0.683449	0	0.622852	0	0	0	0	0	0.73659	0	0	0.710215	0.723402	0.598951	0	0	0	0	0
1_Rothia_mucilaginosa	0	0	0	0	0	0	0	0	0	0	0	0	0	0	0	0	0	-0.468421	0	0	-0.496609	-0.526877	0	0	0	0	0.536135	0	0	0	0	0	0	0	0	0	0	0	0	0	0	0	0	0	0	0	0	0	0
2_Neisseria_sicca	0	0	0	0	0	0	0	0	0	0	0	0	0	0	0	0	0	0	0	0	0	0	0	0	0	0	0	0	0	0	0	0	0	0	0	0	0	0	0	0	0	0	0	0	0	0	0	0	0
2_Neisseria_elongata	0	0	0	0	0	0	0	0	0	0	0	0	0	0	0	0	0	0	0	0	0	0	0	0	0	0	0	0	0	0	0	0	0	0	0	0	0	0	0	0	0	0	0	0	0	0	0	0	0
2_Lautropia_mirabilis	0	0	0	0	0	0	0	0	0	0	0	0	0	0	0	0	0	0	0.591549	0	0	0	0	0	0	0	0	0	0	0	0	0	0	0	0	0	0	0	0	0	0	0	0	0	0	0	0	0	0
2_Micrococcus_luteus	0	0	0	0	0	0	0	0	0	0	0	0	0	0	0	0	0	0	0	0	0	0	0	0	0	0	0	0	0	0	0	0	0	0	0	0	0	0	0	0	0	0	0	0	0	0	0	0	0
2_Capnocytophaga_sputigena	0	0	0	0	0	0	0	0	0	0	0	0	0	0	0	0	0	0.496921	0.532217	0.481026	0.59958	0	0	0	0	0	0	0	0	0	0	0	0	0	0	0	0	0	0	0	0	0	0	0	0	0	0	0	0
2_Streptococcus_sanguinis	0.717544	0	0	0	0	0	0	0	0	0	0	0	0	0	0	0	0	0	0	0	0	0	0	0	0	0	0	0	0	0	0	0	0	0	0	0	0	0	0	0	0	0	0	0	0	0	0	0	0
2_Capnocytophaga_gingivalis	0	0	-0.526594	0	0	0	0	0	0	0	0	0	0	0	0	0	0	0	0.609155	0.552817	0	0	0	0	0	0	0	0	0	0	0	0	0	0	0	0	0	0	0	0	0	0	0	0	0	0	0	0	0
2_Capnocytophaga_leadbetteri	0	0	0	0	0	-0.480832	0	0	0	0	0	0	0	0	0	0	0	0	0	0	0	0	0	0	0	0	0	0	0.518649	0	0	0	0	0	0	0	0	0	0	0	0	0	0	0	0	0	0	0	0
2_Micrococcus_sp_EYE_162	0	0	0	0	0	0	0	0	0	0	0	0	0	0	0	0	0	0	0	0	0	0	0	0	0	0	0	0	0	0	0	0	0	0	0	0	0	0	0	0	0	0	0	0	0	0	0	0	0
2_Kingella_bonacorsii	0	0	0	0	0	0	0	-0.512393	0	0	0	0	0	0	0	0	0	-0.534108	0	0	0	0	0	0	0	0	0	0	0.458097	0	0	0	0	0	0	0	0	0	0	0	0	0	0	0	0	0	0	0	0
3_Actinomyces_dentalis	0.458779	-0.546936	-0.669571	0	0	0	0	0	0	0	0	0	0	0	0.871186	0	0	0	0	0	0	0	0	0	0	0	0	0	0	0	0	0	0	0	0	0	0	0.788857	0	0	0	0	0	0	0	0	0	0	0
3_Fusobacterium_nucleatum	0	0	-0.480913	0	0	0	0	0	0	0	0	0	0	0	0	0	0	0	0	0	0	0	0	0	0	0	0	0	0	0	0	0	0	0	0	0	0	0	0	0	0	0	0	0	0	0	0	0	0
3_Prevotella_oris	0	-0.753766	0	-0.524785	0	0	0	0	0.793665	0	0	0	0	0	0	0.750679	0	0	0	0	0	0	0	0	0	0	0	0	0	0	0	0	0	0	0	0	0	0	0.753544	0	0	0.716809	0	0	0	0	0	0	0
3_Prevotella_nigrescens	0	-0.458779	0	0	0	0	0	0	0	0	0	0	0	0	0	0	0	0	0	0	0	0	0	0	0	0	0	0.595941	0	0.539997	0	0	0.737003	0	0	0	0	0	0	0	0	0	0.7532	0	0	0	0	0	0
3_Actinomyces_naeslundii	0	0	0	0	0	0	0	0	0	0	0	0	0	0	0	0	0	0	0	0	0	0	0	0	0	0	0	0	0	0	0	0	0	0	0	0	0	0	0	0	0	0	0	0	0	0	0	0	0
3_Prevotella_denticola	0.517523	0	0	0	0	0	0	0	0	0	0	0	0	0	0	0	0	0	0	0	0	0	0	0	0	0	0	0.578788	0	0.606983	0.737003	0	0	0	0	0	0	0	0	0	0	0	0	0	0	0	0	0	0
3_Porphyromonas_endodontalis	0	0	0	0	0	0	0	0	0	0	0	0	0	0	0	0	0	0	0	0	0	0	0	0	0	0	0	0	0	0	0	0	0	0	0.827874	0	0	0	0	0	0	0	0	0	0	0	0	0	0
3_Alloprevotella_tannerae	0	0	0	0	0	0	0	0	0	0	0	0	0	0	0	0	0	0	0	0	0	0	0	0	0	0	0	0	0	0.518412	0	0	0	0.827874	0	0	0	0	0	0	0	0	0	0	0	0	0	0	0
3_Corynebacterium_matruchotii	0	-0.500729	-0.538386	0	0	0	0	0	0	0	0	0	0	0	0.708147	0	0	0	0	0	0	0	0	0	0	0	0	0.643246	0	0	0	0.568716	0	0	0	0	0	0	0	0	0	0	0	0	0	0	0	0	0
3_Capnocytophaga_SGB2480	0	-0.560487	0	-0.587828	0	0	0	0	0	0	0	0.479306	0	0	0	0	0	0.613216	0.51452	0	0.518961	0.517846	0	0	0	0	0	0	0	0	0	0	0	0	0	0	0	0	0	0	0	0	0	0	0	0	0	0	0
3_Candidatus_Nanosynsacchari_sp_TM7_ANC_38_39_G1_1	0	-0.54627	-0.490237	0	0	0	0	0	0	0	0	0	0	0	0	0	0	0	0	0	0	0	0	0	0	0	0	0.788857	0	0	0.585147	0	0.548294	0	0	0.54456	0	0	0	0	0	0	0	0	0	0	0	0	0
3_Slackia_exigua	0	-0.604638	0	0	0	0	0	0	0.649932	0	0	0.583405	0	0	0	0.73659	0	0	0	0	0	0	0	0	0	0	0	0	0	0.753544	0.494525	0	0	0	0.588721	0	0	0.527152	0	0	0.737156	0.721569	0	0	0	0	0	0	0
3_GGB7107_SGB10420	0	0	0	0	0	0	0	0	0	0	0	0	0	0	0	0	0	0	0	0	0	0	0	0	0	0	0	0	0	0	0	0	0	0	0	0	0	0	0	0	0	0	0	0	0	0	0	0	0
3_Lancefieldella_rimae	0	-0.600998	0	0	0	0	0	0	0	0	0	0	0	0	0	0	0	0	0	0	0	0	0	0	0	0	0	0.462505	0	0.637207	0.609052	0	0	0.496398	0.680255	0	0	0.570258	0.737156	0	0	0	0	0	0	0	0	0	0
3_Parvimonas_micra	0	0	0	0	0	0	0	0	0.581171	0	0	0	0	0.625442	0	0.710215	0	0	0	0	0	0	0	0	0	0	0	0	0	0.716809	0.509742	0	0.491375	0	0	0	0	0	0.721569	0	0	0	0	0	0	0	0	0	0
3_Selenomonas_SGB5897	0	-0.676971	0	-0.528594	0	0	0	0	0.568926	0	-0.50656	0.659582	0	0	0	0.723402	0	0	0	0	0	0	0	0	0	0	0	0.500231	0	0.655584	0.7532	0	0.493439	0	0	0	0	0.459651	0.592157	0	0.514295	0	0	0	0	0	0	0	0
3_Schaalia_meyeri	0	0	0	0	0	0.470077	0	0	0.464719	0	0	0.530463	0	0	0	0	0	0	0	0	0	0	0	0	0	0	0	0	0	0	0	0	0	0	0	0	0	0	0	0	0	0	0	0	0	0	0	0	0
3_Stutzerimonas_stutzeri	0	0	0	0	0	0	0	0	0	0	0	0	0	0	0	0	0	0	0	0	0.53283	0	0	0	0	0	0	0	0	0	0	0	0	0	0	0	0	0	0	0	0	0	0	0	0	0	0.747409	0	0
3_Treponema_SGB69454	0	0	0	0	0	0	0	0	0	0	0	0	0	0	0	0	0	0	0	0	0	0	0	0	0	0	0	0	0	0	0	0	0	0.494535	0	0	0	0	0	0	0	0	0	0	0	0	0	0	0
3_Exiguobacterium_alkaliphilum	0	0	0	0	0	0	0.504382	0	0	0	0	0	0	0	0	0	0	0	0	0	0.615947	0	0	0	0	0	0	0	0	0	0	0	0	0	0	0	0	0	0	0	0	0	0	0	0.747409	0	0	0	0
3_Neisseria_SGB9428	0	0	0	0	0	0	0	0	0	0	0	0	0	0	0	0	0	0	0	0	0	0	0	0	0	0	0	0	0	0	0	0	0	0	0	0	0	0	0	0.541959	0	0	0	0	0	0	0	0	0
3_Rothia_SGB49305	0	0	0	0	0	0	0	0	0	0	0	0	0	0	0	-0.496162	0.616536	0	0	0	0	0	0	0	0	0	0	0	0	0	0	0	0	0	0	0	0	0	0	0	0	0	0	0	0	0	0	0	0
3_Neisseria_sp_oral_taxon_014	0	0	0	0	0	0	0	0	0	0	0	0	0	0	0	0	0	0	0	0	0	0	0	0	0	0	0	0	0	0	0	0	0	0	0	0	0	0	0	0	0	0	0	0	0	0	0	0	0
[truncated: 1 more columns]

## Sheet: Week2
Week 2	1_Veillonella_parvula	1_Haemophilus_parainfluenzae	1_Streptococcus_mitis	1_Streptococcus_oralis	1_Actinomyces_oris	1_Streptococcus_gordonii	1_Porphyromonas_bobii	1_Haemophilus_haemolyticus	1_Streptococcus_anginosus	1_Granulicatella_adiacens	1_Rothia_aeria	1_Prevotella_melaninogenica	1_Streptococcus_intermedius	1_Schaalia_odontolytica	1_Leptotrichia_wadei	1_Prevotella_pallens	1_Rothia_mucilaginosa	2_Neisseria_sicca	2_Neisseria_elongata	2_Lautropia_mirabilis	2_Micrococcus_luteus	2_Capnocytophaga_sputigena	2_Streptococcus_sanguinis	2_Capnocytophaga_gingivalis	2_Capnocytophaga_leadbetteri	2_Micrococcus_sp_EYE_162	2_Kingella_bonacorsii	3_Actinomyces_dentalis	3_Fusobacterium_nucleatum	3_Prevotella_oris	3_Prevotella_nigrescens	3_Actinomyces_naeslundii	3_Prevotella_denticola	3_Porphyromonas_endodontalis	3_Alloprevotella_tannerae	3_Corynebacterium_matruchotii	3_Capnocytophaga_SGB2480	3_Candidatus_Nanosynsacchari_sp_TM7_ANC_38_39_G1_1	3_Slackia_exigua	3_GGB7107_SGB10420	3_Lancefieldella_rimae	3_Parvimonas_micra	3_Selenomonas_SGB5897	3_Schaalia_meyeri	3_Stutzerimonas_stutzeri	3_Treponema_SGB69454	3_Exiguobacterium_alkaliphilum	3_Neisseria_SGB9428	3_Rothia_SGB49305
1_Veillonella_parvula	0	0	0	0	0	0	0	0	0	0	0	0	0	0.733094	0	0	0	0	0	0	0	0	0	0	0	0	0	0	0	0	0	0	0	0	0	0	0	0	0	0	0	0	0	0	0	0	0	0	0
1_Haemophilus_parainfluenzae	0	0	0	0	0	0	0	0	0	0	0	0	0	0	0	0	0	0	0	0	0	0	0	0	0	0	0	0	0	0	0	0	0	0	0	0	0	0	0	0	0	0	0	0	0	0	0	0	0
1_Streptococcus_mitis	0	0	0	0	0	0	0	0	0	0	0	0	0	0	0	0	0	0	0	0	0	0	0	0	0	0	0	0	0	0	0	0	0	0	0	0	0	0	0	0	0	0	0	0	0	0	0	0	0
1_Streptococcus_oralis	0	0.556384	0	0	0	0	0	0	0	0	0	0	0	0	0	0	0	0	0	0	0	0	0	0	0	0	0	0	0	0	0	0	0	0	0	0	0	0	0	0	0	0	0	0	0	0	0	0	0
1_Actinomyces_oris	0	0	0	0	0	0	0	0	0	0	0	0	0	0	0	0	0	0	-0.490928	0	0	0	0	0	0	0	0	0	0	0	0	0	0	0	0	0	0	0	0	0	0	0	0	0	0	0	0	0	0
1_Streptococcus_gordonii	0	0	0	0	0	0	0	0	0	0	0	0	0	0	0	0	0	0	0	0	0	0	0	0	0	0	0	0	0	0	0	0	0	0	0	0	0	0	0	0	0	0	0	0	0	0	0	0	0
1_Porphyromonas_bobii	0	0	0	0	0	0	0	0	0	0	0	0	0	0	0	0	0	0	0	0.692661	0	0	0	0	0.622624	0	0	0	0.530364	0	0.467034	0	0	0	0	0	0	0	0	0	0	0	0	0	0	0	0	0	0
1_Haemophilus_haemolyticus	0	0	0.502053	0	0	0	0	0	0	0	0	0	0	0	0	0	0	0	0	0	0	0	0	0	0	0	0	0	0	0	0	0	0	0	0	0	0	0	0	0	0	0	0	0	0	0	0	0	0
1_Streptococcus_anginosus	0.469779	0	0	0	0	0	0	0	0	0	0	0	0	0	0	0	0	0	0	0	0	0	0	0	0	0	0	0.546125	0	0.673411	0.652392	0	0.615288	0	0	0	0	0	0.799134	0	0.741008	0	0.786983	0	0	0	0	0	0
1_Granulicatella_adiacens	0.617143	0	0	0.460458	0	0.473592	0	0	0	0	0	0	0	0	0	0	0	0	0	0	0	0	0.640845	0	0.560518	0	0	0	0	0	0	0.711011	0	0	0	0	0	0	0	0	0	0	0	0	0	0	0	0	0
1_Rothia_aeria	0	0	0	0	0	0	0	0	0	0	0	0	0	0	0	0	0	0	0	0.488325	0	0	0	0	0	0	0	0	0	0	0	0	0	0	0	0	0	0	0	0	0	0	0	0	0	0	0	0	0
1_Prevotella_melaninogenica	0	0	0	0	0	0	0	0.505909	0.461255	0	0	0	0	0	0	0	0	0	0	0	0	0	0	0	0	0	0	0	0	0	0	0	0.545652	0	0.591639	0	0	0	0	0	0	0	0	0	0	0	0	0	0
1_Streptococcus_intermedius	0	0	0	0	0	0	0	0	0	0	0	0	0	0	0	0	0	0	0	0	0	0	0	0	0	0	0	0	0	0	0	0	0	0	0	0	0	0	0	0	0	0	0	0	0	0	0	0	0
1_Schaalia_odontolytica	0.733094	0	0	0	0	0	0	0	0	0.643633	0	0	0	0	0	0	0	0	0	0	0	0	0.606398	0	0.46473	0	0	0	0	0	0	0.780357	0	0	0	0	0	0	0	0	0	0	0	0	0	0	0	0	0
1_Leptotrichia_wadei	0	0	-0.483956	0	0	0	0	0	0.507754	0	0	0	0	0	0	0	0	0	0	0	0	0	0	0	0	0	0	0.831666	0.52476	0.461249	0.542529	0	0	0	0	0	0	0.516166	0.517398	0	0.610283	0	0.682473	0	0	0	0	0	0
1_Prevotella_pallens	0	0	0	0	0	0	0.553855	0	0.540174	0	0	0.604843	0.460784	0	0.525447	0	0	0	0	0	0	0	0	0	0	0	0	0	0	0	0	0	0.530367	0	0.545361	0	0	0.641797	0.501039	0	0.501698	0.537255	0.629189	0	0	0	0	0	0
1_Rothia_mucilaginosa	0	0	0	0.46256	0	0	0	0	0	0	0	0	0	0	0	0	0	0	0	0	0	0	0	0	0	0	0.552569	0	0	0	0	0	0	0	0	0	0	0	0	0	0	0	0	0	0	0	0	0	0
2_Neisseria_sicca	0	0	0	0	0	0	0	0	0	0	0	0	0	0	0	0	0	0	0	0	0	0.783763	0	0.691971	0	0	0	0	0	0	0	0	0	0	0	0	0	0	0	0	0	0	0	0	0	0	0	0	0
2_Neisseria_elongata	0	0	0	0	0	0	0	0	0	0	0	0	0	0	0	0	0	0.506965	0	0	0	0	0	0.783047	0	0	0	0	0	0	0	0	0	0	0	0	0	0	0	0	0	0	0	0	0	0	0	0	0
2_Lautropia_mirabilis	0	0	0	0	0	0	0.692661	0	0	0	0	0	0	0	0	0	0	0	0.520838	0	0	0	0	0.707965	0.69803	0	0	0	0	0	0	0	0	0	0	0	0	0	0	0	0	0	0	0	0	0	0	0	0
2_Micrococcus_luteus	0	0	0	0	0	0	0	0	0	0	0	0	0	0	0	0	0	0	0	0	0	0	0	0	0	0.67585	0	0	0	0	0	0	0	0	0	0	0	0	0	0	0	0	0	0	0	0	0	0	0
2_Capnocytophaga_sputigena	0	0	0	0	0	0	0	0	0	0	0	0	0	0	0	0	0	0.783763	0.664919	0.555752	0	0	0	0.821239	0	0	0	0	0	0	0	0	0	0	0	0	0	0	0	0	0	0	0	0	0	0	0	0	0
2_Streptococcus_sanguinis	0.555605	0	0	0	0	0	0	0	0	0	0	0	0	0	0	0	0	0	0	0.629305	0	0.562226	0	0	0	0	0	0	0	0	0	0.760657	0	0	0	0	0	0	0	0	0	0	0	0	0	0	0	0	0
2_Capnocytophaga_gingivalis	0	0	0	0	0	0	0	0	0	0	0	0	0	0	0	0	0	0.691971	0.783047	0.707965	0	0.821239	0.477495	0	0	0	0	0	0	0	0	0	0	0	0	0	0	0	0	0	0	0	0	0	0	0	0	0	0
2_Capnocytophaga_leadbetteri	0	0	0	0	0	0	0	0	0	0	0	0	0	0	0	0	0	0	0	0.69803	0	0	0.660483	0	0	0	0	0.49614	0	0	0	0	0	0	0	0	0	0	0	0	0	0	0	0	0	0	0	0	0
2_Micrococcus_sp_EYE_162	0	0	0	0	0	0	0	0	0	0	0	0	0	0	0	0	0	0	0	0	0.67585	0	0	0	0	0	0	0	0	0	0	0	0	0	0	0	0	0	0	0	0	0	0	0	0	0	0	0	0
2_Kingella_bonacorsii	0	0	0	0	0	0	0	0	0	0.493146	0	0	0	0	0	0	0	0	0	0	0	0	0.572962	0	0.56601	0	0	0	0	0	0	0.483259	0	0	0	0.519369	0	0	0	0	0	0	0	0	0	0	0	0	0
3_Actinomyces_dentalis	0	0	-0.470679	0	0	0	0	0	0	0	0	0	0	0	0.831666	0	0	0	0	0	-0.458392	0	0	0	0	0	0	0	0.732568	0	0	0	0	0	0	0.733708	0	0	0	0	0	0	0	0	0	0	0	0	0
3_Fusobacterium_nucleatum	0	0	0	0	0	0	0	0	0	0	0	0	0	0	0	0	0	0	0	0	0	0	0	0	0	0	0	0.732568	0	0	0	0	0	0	0	0.68386	0	0	0	0	0	0	0	0	0	0	0	0	0
3_Prevotella_oris	0	0	0	0	0	0	0	0	0.673411	0	0	0	0	0	0	0	0	0	0	0	0	0	0	0	0	0	0	0.455596	0.476334	0	0.865264	0	0.79448	0	0	0	0	0	0.799059	0	0.870862	0	0	0	0	0	0	0	0
3_Prevotella_nigrescens	0	0	0	-0.524063	0	0	0	0	0	0	0	0	0	0	0	0	0	0	0	0	0	0	0	0	0	0	0	0.580424	0.60818	0.865264	0	0	0.740277	0	0	0	0	0.756073	0.805871	0	0.898893	0.698564	0	0	0	0	0	0	0
3_Actinomyces_naeslundii	0.658722	0	0	0	0	0	0	0	0	0.711011	0	0	0	0.780357	0	0	0	0	0	0	0	0	0.760657	0	0	0	0	0	0	0	0	0	0	0	0	0	0	0	0	0	0	0	0	0	0	0	0	0	0
3_Prevotella_denticola	0	-0.485167	0	0	0	0	0	0	0	0	0	0	0	0	0	0	0	0	0	0	0	0	0	0	0	0	0	0	0	0.79448	0.740277	0	0	0	0	0	0	0	0.748702	0	0.806646	0	0	0	0	0	0	0	0
3_Porphyromonas_endodontalis	0	0	0	0	-0.581969	0	0	0	0	0	0	0	0	0	0	0	0	0	0	0	0	0	0	0	0	0	0	0	0	0	0	0	0	0	0.681779	0	0	0	0	0	0	0.741192	0	0	0	0	0	0	0
3_Alloprevotella_tannerae	0	0	0	0	0	0	0	0	0	0	0	0	0	0	0	0	0	0	0	0	0	0	0	0	0	0	0	0	0	0	0	0	0.524933	0.681779	0	0	0	0	0	0	0	0	0	0	0	0	0	0	0
3_Corynebacterium_matruchotii	0	0	-0.460466	0	0	0	0	0	0	0	0	0	0	0	0	0	0	0	0	0	0	0	0.466552	0	0.625334	0	0	0.733708	0.68386	0	0	0	0	0	0	0	0	0	0	0	0	0	0	0	0	0	0	0	0
3_Capnocytophaga_SGB2480	0	0	0	-0.471413	0	0	0.645493	0	0	0	0	0	0	0	0	0	0	0.45799	0.478339	0.546853	0	0	0	0.503028	0	0	0	0	0	0	0.612008	0	0	0.541653	0	0	0	0.68055	0	0	0	0.749063	0	0	0	0	0	0	0
3_Candidatus_Nanosynsacchari_sp_TM7_ANC_38_39_G1_1	0	0	0	0	0	0	0.563089	0	0.461466	0	0	0.529023	0	0	0	0	0	0	0	0	0	0	0	0	0	0	0	0.503039	0	0.624746	0.756073	0	0.579625	0.594549	0.636554	0	0.68055	0	0.757126	0	0.690444	0.893587	0	0	0	0	0	0	0
3_Slackia_exigua	0	0	0	0	0	0	0	0	0.799134	0	0	0.658935	0	0	0	0	0	0	0	0	0	0	0	0	0	0	0	0.61781	0.470952	0.799059	0.805871	0	0.748702	0	0.580492	0	0	0.757126	0	0	0.775117	0	0	0	0	0	0	0	0
3_GGB7107_SGB10420	0	0	0	0	0	0	0	0	0	0	0	0	0	0	0	0	0	0	0	0	0	0	0	0	0	0	0	0	0	0	0	0	0	0	0	0	0	0	0	0	0	0	0	0	0	0	0	0	0
3_Lancefieldella_rimae	0	0	0	0	0	0	0	0	0.741008	0	0	0	0	0	0	0	0	0	0	0	0	0	0	0	0	0	0	0.566771	0	0.870862	0.898893	0	0.806646	0	0	0	0	0.690444	0.775117	0	0	0	0	0	0	0	0	0	0
3_Parvimonas_micra	0	0	0	0	-0.5898	0	0.59059	0	0	0	0	0	0	0	0	0	0	0	0	0	0	0	0	0	0	0	0	0	0	0.475286	0.698564	0	0	0.741192	0.655204	0	0.749063	0.893587	0.597392	0	0.530602	0	0	0	0	0	0	0	0
3_Selenomonas_SGB5897	0	0	0	0	0	0	0	0	0.786983	0	-0.501498	0	0	0	0.682473	0	0	0	0	0	0	0	0	0	0	0	0	0.459852	0	0.590329	0.55161	0	0.572846	0	0	0	0	0	0.647254	0	0.625978	0	0	0	0	0	0	0	0
3_Schaalia_meyeri	0.604774	0	0	0	0	0.574933	0	0	0	0.474004	0	0	0	0	0	0	0	0	0	0	0	0	0	0	0	0	0	0	0	0	0	0.499159	0	0	0	0	0	0	0	0	0	0	0	0	0	0	0	0	0
3_Stutzerimonas_stutzeri	0	0	0	0	0	0	0	0	0	0	0	0	0	0	0	0	0	0	0	0	0	0	0	0	0	0	0	0	0	0	0	0	0	0	0	0	0	0	0	0	0	0	0	0	0	0	1	0	0
3_Treponema_SGB69454	0	0	0	0	0	0	0	0	0	0	0	0	0	0	0	0	0	0	0	0	0	0	0	0	0	0	0	0	0	0	0	0	0	0.616413	0	0	0	0	0	0	0	0	0	0	0	0	0	0	0
3_Exiguobacterium_alkaliphilum	0	0	0	0	0	0	0	0	0	0	0	0	0	0	0	0	0	0	0	0	0	0	0	0	0	0	0	0	0	0	0	0	0	0	0	0	0	0	0	0	0	0	0	0	1	0	0	0	0
3_Neisseria_SGB9428	0	0	0	0	0	0	0	0	0	0	0	0	0	0	0	0	0	0	0	0	0	0	0	0	0.458657	0	0	0	0	0	0	0	0	0	0	0	0.592801	0	0	0.474214	0	0	0	0	0	0	0	0	0
3_Rothia_SGB49305	0	0	0.456437	0	0	0	0	0	0	0	0.483007	0	0	0	0	0	0	0	0	0	0	0	0	0	0	0	0.469231	0	0	0	0	0	0	0	0	0	0	0	0	0	0	0	0	0	0	0	0	0	0
3_Neisseria_sp_oral_taxon_014	0	0	0	0	0	0	0.51254	0	0	0	0	0	0	0	0	0	0	0	0	0.458251	0	0	0	0	0.4899	0	0	0	0	0	0	0	0	0	0	0	0.456923	0	0	0	0	0	0	0	0	0	0	0	0
[truncated: 1 more columns]

## Sheet: Week3
Week3	1_Veillonella_parvula	1_Haemophilus_parainfluenzae	1_Streptococcus_mitis	1_Streptococcus_oralis	1_Actinomyces_oris	1_Streptococcus_gordonii	1_Porphyromonas_bobii	1_Haemophilus_haemolyticus	1_Streptococcus_anginosus	1_Granulicatella_adiacens	1_Rothia_aeria	1_Prevotella_melaninogenica	1_Streptococcus_intermedius	1_Schaalia_odontolytica	1_Leptotrichia_wadei	1_Prevotella_pallens	1_Rothia_mucilaginosa	2_Neisseria_sicca	2_Neisseria_elongata	2_Lautropia_mirabilis	2_Micrococcus_luteus	2_Capnocytophaga_sputigena	2_Streptococcus_sanguinis	2_Capnocytophaga_gingivalis	2_Capnocytophaga_leadbetteri	2_Micrococcus_sp_EYE_162	2_Kingella_bonacorsii	3_Actinomyces_dentalis	3_Fusobacterium_nucleatum	3_Prevotella_oris	3_Prevotella_nigrescens	3_Actinomyces_naeslundii	3_Prevotella_denticola	3_Porphyromonas_endodontalis	3_Alloprevotella_tannerae	3_Corynebacterium_matruchotii	3_Capnocytophaga_SGB2480	3_Candidatus_Nanosynsacchari_sp_TM7_ANC_38_39_G1_1	3_Slackia_exigua	3_GGB7107_SGB10420	3_Lancefieldella_rimae	3_Parvimonas_micra	3_Selenomonas_SGB5897	3_Schaalia_meyeri	3_Stutzerimonas_stutzeri	3_Treponema_SGB69454	3_Exiguobacterium_alkaliphilum	3_Neisseria_SGB9428	3_Rothia_SGB49305
1_Veillonella_parvula	0	0	0	0	0	0	0	0	0	0	0	0	0	0	0	0	0	0	0	0	0	0	0	0	0	0	0	0	0	0	0	0	0	0	0	0	0	0	0	0	0	0	0	0	0	0	0	0	0
1_Haemophilus_parainfluenzae	0	0	0	0	0	0	0	0	0	0	0	0	0	0	0	0	0	0	0	0	0	0	0	0	0	0	0	0	0	0	0	0	0	0	0	0	0	0	0	0	0	0	0	0	0	0	0	0	0
1_Streptococcus_mitis	0	0	0	0	0	0	0	0	0	0	0	0	0	0	0	0	0	0	0	0	0	0	0	0	0	0	0	0	0	0	0	0	0	0	0	0	0	0	0	0	0	0	0	0	0	0	0	0	0
1_Streptococcus_oralis	0	0	0.601754	0	0	0	0	0	0	0	0	0	0	0	0	0	0	0	0	0	0	0	0	0	0	0	0	0	0	0	0	0	0	0	0	0	0	0	0	0	0	0	0	0	0	0	0	0	0
1_Actinomyces_oris	0	0	0	0	0	0	0	0	0	0	0	0	0	0	0	0	0	0	0	0	0	0	0	0	0	0	0	0	0	0	0	0	0	0	0	0	0	0	0	0	0	0	0	0	0	0	0	0	0
1_Streptococcus_gordonii	0	0	0	0	0	0	0	0	0	0	0	0	0	0	0	0	0	0	0	0	0	0	0	0	0	0	0	0	0	0	0	0	0	0	0	0	0	0	0	0	0	0	0	0	0	0	0	0	0
1_Porphyromonas_bobii	0	0	0	0	0	0	0	0	0	0	0	0	0	0	0	0	0	0	0	0	0	0	0	0	0.509338	0	0	0	0	0	0.489717	0	0	0	0	0	0	0	0	0	0	0.735488	0	0	0	0	0	0	0
1_Haemophilus_haemolyticus	0	0	0	0	0	0	0	0	0	0	0	0	0	0	0	0	0	0	0	0	0	0	0	0	0	0	0	0	0	0	0	0	0	0	0	0	0	0	0	0	0	0	0	0	0	0	0	0	0
1_Streptococcus_anginosus	0	0	0	0	0	0	0.565614	0	0	0	0	0	0	0	0	0	0	0	0	0	0	0	0	0	0	0	0	0	0	0.677663	0.752768	0	0.479309	0	0	0	0	0	0.848301	0	0	0	0	0	0	0	0	0	0
1_Granulicatella_adiacens	0	0	0	0	0	0.651108	0	0	0	0	0	0	0	0	0	0	0	0	0	0.478947	0	0	0.580702	0	0	0	0	0	0	0	0	0.581723	0	0	0	0	0	0	0	0	0	0	0	0	0	0	0	0	0
1_Rothia_aeria	-0.502637	0.480509	0	0	0	0	0	0	0	0	0	0	0	0	0	0	0	0	0	0.620388	0	0	0	0	0	0	0	0	0	0	0	0	0	0	0	0	0	0	0	0	0	0	0	0	0	0	0	0	0
1_Prevotella_melaninogenica	0	0	0	0	0	0	0.461708	0	0.704797	0	0	0	0	0	0	0	0	0	0	0	0	0	0	0	0	0	0	0	0	0.574933	0.498155	0	0	0	0.632841	0	0	0	0	0	0	0	0	0	0	0	0	0	0
1_Streptococcus_intermedius	0	0	0	0	0	0	0	0	0	0	0	0	0	0	0	0	0	0	0	0	0	0	0	0	0	0	0	0	0	0	0	0	0	0	0	0	0	0	0	0	0	0	0	0	0	0	0	0	0
1_Schaalia_odontolytica	0	0	0	0	0	0	0	0	0	0.486473	0	0	0	0	0	0	0	0	0	0.666451	0	0	0.540823	0	0	0	0	0	0	0	0	0	0	0	0	0	0	0	0	0	0	0	0	0	0	0	0	0	0
1_Leptotrichia_wadei	0.624933	0	0	0	0	0	0	0	0	0	0	0	0	0	0	0	0	0	0	0	-0.478679	0	0	0	0	0	0.48913	0.749802	0	0	0	0	0	0	0	0.743851	0	0.685837	0	0	0	0	0.518183	0	0	0	0	0	0
1_Prevotella_pallens	0	0	0	0	0	0	0.568532	0	0.558124	0	0	0.474977	0	0	0	0	0	0	0	0	0	0	0	0	0	0	0	0	0	0	0	0	0	0	0.53318	0	0	0	0.495009	0	0	0	0.484664	0	0	0	0	0	0
1_Rothia_mucilaginosa	0	0	0	0	0	0	0	0	0	0	0	0	0	0	0	0	0	0	0	0	0	0	0	0	0	0	0	0	0	0	0	0	0	0	0	0	0	0	0	0	0	0	0	0	0	0	0	0	0.795992
2_Neisseria_sicca	0	0	0	0	0	0	0	0	0	0	0	0	0	0	0	0	0	0	0	0	0	0	0	0	0	0	0	0	0	0	0	0	0	0	0	0	0	0	0	0	0	0	0	0	0	0	0	0	0
2_Neisseria_elongata	0	0	0	0	0	0	0	0	0	0	0	0	0	0	0	0	0	0	0	0	0	0	0	0	0	0	0	0	0	0	0	0	0	0	0	0	0	0	0	0	0	0	0	0	0	0	0	0	0
2_Lautropia_mirabilis	0	0.518604	0	0	0	0	0	0	0	0	0	0	0	0	0	0	0	0	0	0	0	0	0	0	0	0	0	0	0	0	0	0	0	0	0	0	0	0	0	0	0	0	0	0	0	0	0	0	0
2_Micrococcus_luteus	0	0	0	0	0	0	0	0	0	0	0	0	0	0	0	0	0	0	0	0	0	0	0	0	0	0	0	0	0	0	0	0	0	0	0	0	0	0	0	0	0	0	0	0	0	0	0.737524	0	0
2_Capnocytophaga_sputigena	0	0	0	0	0	0	0	0	0	0	0	0	0	0	0	0	0	0.551846	0.575465	0	0	0	0	0	0	0	0	0	0	0	0	0	0	0	0	0	0	0	0	0	0	0	0	0	0	0	0	0	0
2_Streptococcus_sanguinis	0	0	0	0	0	0	0	0	0	0	0	0	0	0	0	0	0	0	0	0	0	0	0	0	0	0	0	0	0	0	0	0	0	0	0	0	0	0	0	0	0	0	0	0	0	0	0	0	0
2_Capnocytophaga_gingivalis	0	0	0	0	0	0	0	0	0	0	0	0	0	0	0	0	0	0	0	0.650285	0	0	0	0	0	0	0	0	0	0	0	0	0	0	0	0	0	0	0	0	0	0	0	0	0	0	0	0	0
2_Capnocytophaga_leadbetteri	0.467275	0	0	0.486745	0	0	0	0	0	0	0	0	0	0	0	0	0	0	0	0	0	0	0.525684	0	0	0	0	0	0	0	0	0	0	0	0	0	0	0	0	0	0	0	0	0	0	0	0	0	0
2_Micrococcus_sp_EYE_162	0	0	0	-0.62013	-0.559022	0	0	0	0	0	0	0	0	0	0	0	0	0	0	0	0	0	0	0	0	0	0	0	0	0	0	0	0	0	0	0	0	0	0	0	0	0	0	0	0	0	0	0	0
2_Kingella_bonacorsii	0	0	0	0	0	0	0	0	0	0	0	0	0	0	0	0	0	0	0	0	0	0	0	0	0	0	0	0.503835	0	0	0	0.651465	0	0	0	0.585163	0	0	0	0	0	0	0	0	0	0	0	0	0
3_Actinomyces_dentalis	0	0	0	0	0	0	0	0	0	0	0	0	0	0	0.749802	0	0	0	0	0	-0.649415	0	0	0	0	0	0	0	0	0	0	0	0	0	0	0	0	0	0	0	0	0	0	0	0	0	0	0	0
3_Fusobacterium_nucleatum	0	0	0	0	0	0	0	0	0	0	0	0	0	0	0	0	0	0	0	0	0	0	0	0	0	0	0	0.478455	0	0	0	0	0	0	0	0	0	0	0	0	0	0	0	0	0	0	0	0	0
3_Prevotella_oris	0	-0.503559	0	0	0	0	0	0	0	0	0	0	0	0	0	0	0	0	0	0	0	0	0	0	0	0	0	0	0.558876	0	0	0	0	0	0	0	0	0	0.761771	0	0.739245	0	0	0	0	0	0	0	0
3_Prevotella_nigrescens	0	0	0	0	0	0	0	0	0.752768	0	0	0	0	0	0	0	0	0	0.513209	0	0	0	0	0	0	0	0	0	0.49656	0.668652	0	0	0	0	0	0	0	0	0	0	0	0	0	0	0	0	0	0	0
3_Actinomyces_naeslundii	0.699474	0	0	0	0	0.539278	0	0	0	0	0	0	0	0	0	0	0	0	0	0	0	0	0.553604	0	0	0	0	0	0	0	0	0	0	0	0	0	0	0	0	0	0	0	0	0	0	0	0	0	0
3_Prevotella_denticola	0	0	0	0	0	0	0	0	0	0	0	0	0	0	0	0	0	0	0	0	0	0	0	0	0	0	0	0	0	0	0.633373	0	0	0	0	0	0	0	0	0	0	0	0	0	0	0	0	0	0
3_Porphyromonas_endodontalis	0	0	0	0	0	0	0.483393	0	0	0	0	0	0	0	0	0	0	0	0.540315	0	0	0	0	0	0	0	0	0	0	0	0.483395	-0.630804	0	0	0	0	0	0	0	0	0	0	0	0	0	0	0	0	0
3_Alloprevotella_tannerae	0	0	0	0	0	0	0	0	0.621771	0	0	0	0	0	0	0	0	0	0	0	0	0	0	0	0	0	0	0	0	0.674059	0.45941	0	0	0.4631	0	0	0	0	0.840693	0	0.748013	0	0	0	0	0	0	0	0
3_Corynebacterium_matruchotii	0.624575	0	0	0	0	0	0	0	0	0	0	0.461419	0	0	0.743851	0	0	0	0	0	-0.461487	0	0	0	0	0	0	0.683258	0	0	0	0.629244	0	0	0	0	0	0	0	0	0	0	0	0	0	0	0	0	0
3_Capnocytophaga_SGB2480	0	0	0	0	-0.474259	0	0	0	0	0	0	0	0	0	0	0	0	0	0	0	0	0	0	0.609215	0	0	0	0	0	0	0	0	0	0	0	0	0	0	0	0	0	0	0	0	0	0	0	0.744683	0
3_Candidatus_Nanosynsacchari_sp_TM7_ANC_38_39_G1_1	0	0	0	0	0	0	0.460923	0	0	0	0	0	0	0	0	0	0	0	0	0	0	0	0	0	0	0	0	0.60682	0	0.492116	0.588835	0	0.626298	0	0	0	0	0	0	0	0	0	0	0	0	0	0	0	0
3_Slackia_exigua	0	0	0	0	0	0	0	0	0.848301	0	0	0.679021	0	0	0	0	0	0	0	0	0	0	0	0	0	0	0	0	0.547141	0.761771	0.620059	0	0.472549	0	0.840693	0	0	0.472133	0	0	0.889449	0	0	0	0	0	0	0	0
3_GGB7107_SGB10420	0	0	0	0	-0.503497	0	0	0	0	0	0	0	0	0	0	0	0	0	0.475971	0	0	0	0	0	0	0	0	0	0	0	0	0	0	0	0	0	0	0	0	0	0	0	0	0	0	0	0	0	0
3_Lancefieldella_rimae	0	0	0	0	0	0	0	0	0.667279	0	0	0.579735	0	0	0	0	0	0	0	0	0	0	0	0	0	0	0	0	0.464773	0.739245	0.566117	0	0.666836	0	0.748013	0	0	0.556819	0.889449	0	0	0	0	0	0	0	0	0	0
3_Parvimonas_micra	0	0	0	0	0	0	0.735488	0	0.516509	0	0	0	0	0	0	0	0	0	0	0	0	0	0	0	0	0	0	0	0.53117	0.692685	0.673115	0	0	0.674088	0	0	0	0	0.494361	0	0.481026	0	0	0	0	0	0	0	0
3_Selenomonas_SGB5897	0	0	0	0	0	0	0	0	0.471932	0	0	0	0	0	0	0	0	0	0	0	0	0	0	0	0	0	0	0.633722	0.615953	0.551432	0	0	0	0	0.633478	0.599564	0	0.624351	0.671762	0	0.625844	0	0	0	0	0	0	0	0
3_Schaalia_meyeri	0	0	0	0	0	0.687291	0	0	0	0	0	0	0	0	0	0	0	0	-0.493991	0	0	0	0	0	-0.459336	0	0	0	0	0	0	0	0	0	0	0	0	0	0	0	0	0	0	0	0	0	0	0	0
3_Stutzerimonas_stutzeri	0	0	0	0	0	0	0	0	0	0	0	0	0	0	0	0	0	0	0	0	0.526422	-0.501086	0	0	0	0	0	0	0	0	0	0	0	0	0	0	0	0	0	0	0	0	0	0	0	0	0.839254	0	0
3_Treponema_SGB69454	0	0	0	0	0	0	0	0	0	0	0	0.470159	0	0	0	0	0	0	0	0	0	0	0	0	0	0	0	0	0	0	0	0	0	0	0	0	0.459906	0	0	0	0	0	0	0	0	0	0	0	0
3_Exiguobacterium_alkaliphilum	0	0	0	0	0	0	0	0	0	0	0	0	0	0	0	0	0	0	-0.47436	0	0.737524	-0.630807	0	0	0	0	0	-0.519671	0	0	-0.48432	0	0	0	0	0	0	0	0	0	0	0	0	0	0.839254	0	0	0	0
3_Neisseria_SGB9428	0	0	0	0	-0.560788	0	0	0	0	0	0	0	0	0	0	0	0	0	0	0	0	0	0	0	0	0	0	0	0	0	0	0	0	0	0	0	0.744683	0	0	0.567477	0	0	0	0	0	0.513042	0	0	0
3_Rothia_SGB49305	0	0	0	0	0	0	0	0	0	0	0	0	0	0	0	0	0.795992	0	0	0	0	0	0	0	0.472866	0	0	0	0	0	0	0	0	0	0	0	0	0	0	0	0	0	0	0	0	0	0	0	0
3_Neisseria_sp_oral_taxon_014	0	0	0	0	0	0	0.471315	0	0	0	0	0	0	0	0	0	0	0	0	0	0	0	0	0	0	0	0	0	0	0	0.51735	0	0	0	0	0	0.66082	0	0	0	0	0	0	0	0	0	0	0.475847	0
[truncated: 1 more columns]

## Sheet: Week4
Week 4	1_Veillonella_parvula	1_Haemophilus_parainfluenzae	1_Streptococcus_mitis	1_Streptococcus_oralis	1_Actinomyces_oris	1_Streptococcus_gordonii	1_Porphyromonas_bobii	1_Haemophilus_haemolyticus	1_Streptococcus_anginosus	1_Granulicatella_adiacens	1_Rothia_aeria	1_Prevotella_melaninogenica	1_Streptococcus_intermedius	1_Schaalia_odontolytica	1_Leptotrichia_wadei	1_Prevotella_pallens	1_Rothia_mucilaginosa	2_Neisseria_sicca	2_Neisseria_elongata	2_Lautropia_mirabilis	2_Micrococcus_luteus	2_Capnocytophaga_sputigena	2_Streptococcus_sanguinis	2_Capnocytophaga_gingivalis	2_Capnocytophaga_leadbetteri	2_Micrococcus_sp_EYE_162	2_Kingella_bonacorsii	3_Actinomyces_dentalis	3_Fusobacterium_nucleatum	3_Prevotella_oris	3_Prevotella_nigrescens	3_Actinomyces_naeslundii	3_Prevotella_denticola	3_Porphyromonas_endodontalis	3_Alloprevotella_tannerae	3_Corynebacterium_matruchotii	3_Capnocytophaga_SGB2480	3_Candidatus_Nanosynsacchari_sp_TM7_ANC_38_39_G1_1	3_Slackia_exigua	3_GGB7107_SGB10420	3_Lancefieldella_rimae	3_Parvimonas_micra	3_Selenomonas_SGB5897	3_Schaalia_meyeri	3_Stutzerimonas_stutzeri	3_Treponema_SGB69454	3_Exiguobacterium_alkaliphilum	3_Neisseria_SGB9428	3_Rothia_SGB49305
1_Veillonella_parvula	0	0	0	0	0	0	0	0	0	0	0	0	0	0	0	0	0	0	0	0	0	0	0	0	0	0	0	0	0	0	0	0	0	0	0	0	0	0	0	0	0	0	0	0	NA	0	NA	0	0
1_Haemophilus_parainfluenzae	0	0	0	0	0	0	0	0	0	0	0	0	0	0	0	0	0	0	0	0	0	0	0	0	0	0	0	0	0	0	0	0	0	0	0	0	0	0	0	0	0	0	0	0	NA	0	NA	0	0
1_Streptococcus_mitis	0	0	0	0	0	0	0	0	0	0	0	0	0	0	0	0	0	0	0	0	0	0	0	0	0	0	0	0	0	0	0	0	0	0	0	0	0	0	0	0	0	0	0	0	NA	0	NA	0	0
1_Streptococcus_oralis	0	0	0.582746	0	0	0	0	0	0	0	0	0	0	0	0	0	0	0	0	0	0	0	0	0	0	0	0	0	0	0	0	0	0	0	0	0	0	0	0	0	0	0	0	0	NA	0	NA	0	0
1_Actinomyces_oris	0	0	0	0	0	0	0	0	0	0	0	0	0	0	0	0	0	0	0	0	0	0	0	0	0	0	0	0	0	0	0	0	0	0	0	0	0	0	0	0	0	0	0	0	NA	0	NA	0	0
1_Streptococcus_gordonii	0	0	0	0	0	0	0	0	0	0	0	0	0	0	0	0	0	0.539021	0	0	0	0.550228	0	0	0	0	0	0	-0.488515	0	0	0	0	0	0	0	0	0	0	0	0	0	0	0	NA	0	NA	0	0
1_Porphyromonas_bobii	0	0	0	0	0	0	0	0	0	0	0	0	0	0	0	0	0	0	0	0	0	0	0	0	0	0	0	0	0	0	0	0	0	0	0	0	0	0	0	0	0	0	0	0	NA	0	NA	0	0
1_Haemophilus_haemolyticus	0	0	0.576763	0	0	0	0	0	0	0	0	0	0	0	0	0	0	0.45894	0	0	0	0	0	0	0	0	0	0	-0.59472	0	0	0	0	0	0	0	0	0	0	0	0	0	0	0	NA	0	NA	0	0
1_Streptococcus_anginosus	0	0	0	0	0	0	0.505682	0	0	0	0	0	0	0	0	0	0	0	0	0	0	0	0	0	0	0	0	0	-0.56052	0	0	0	0	0	0	0	0	0	0	0	0	0	0	0	NA	0	NA	0	0
1_Granulicatella_adiacens	0	0	0	0	0	0.721429	0	0	0	0	0	0	0	0	0	0	0	0.66491	0	0	0	0	0.491147	0.455685	0.486227	0	0	0	-0.499135	0	0	0	0	0	0	0	0	0	0	0	0	0	0	0	NA	0	NA	0	0
1_Rothia_aeria	0	0	0	0	0	0	0	0	0	0.51597	0	0	0	0	0	0	0	0	0	0	0	0	0.617958	0.588028	0	0	0	0	0	0	0	0	0	0	0	0	0	0	0	0	0	0	0	0	NA	0	NA	0	0
1_Prevotella_melaninogenica	0	0	0	0.489852	0	0	0	0.494454	0	0	0.462491	0	0	0	0	0	0	0	0	0	0	0	0	0	0.465487	0	0	0.57465	-0.827321	0	0	0	0	0	0	0	0	0	0	0	0	0	0	0	NA	0	NA	0	0
1_Streptococcus_intermedius	0	0	0	0	0	0	0	0	0	0	0	0	0	0	0	0	0	0	0	0	0	0	0	0	0	0	0	0	0	0	-0.462206	0	0	0	0	0	0	0	0	0	0	0	0	0	NA	0	NA	0	0
1_Schaalia_odontolytica	0.643285	0	0	0.502502	0	0	0	0	0	0	0	0.476092	0	0	0	0	0	0.549807	0	0.690829	0	0	0.727423	0	0	0	0	0	-0.552406	0	0	0	0	0	0	0	0	0	0	0	0	0	0	0	NA	0	NA	0	0
1_Leptotrichia_wadei	0	0	0	0	0	0	0.528981	0	0	0	0	0	0	0	0	0	0	0	0	0	0	0	0	0	0.458275	-0.48858	0	0.642883	0	0	0	0.458445	0	0	0	0.597235	0	0	0	0	0	0	0.490746	0	NA	0	NA	0	0
1_Prevotella_pallens	0.502189	0	0	0	0	0.490102	0.641572	0	0.574811	0	0	0.476028	0	0.554978	0.475987	0	0	0	0	0.545071	0	0	0	0	0.485182	0	0	0	0	0	0	0	0	0	0	0	0	0	0	0	0	0	0	0	NA	0	NA	0	0
1_Rothia_mucilaginosa	0	0	0	0	0	0	0	0	0	0.531831	0.529875	0.516823	0	0	0	0	0	0	0	0	0	0	0	0	0.556579	0	0.579735	0	0	0	0	0	0	0	0	0	0	0	0	0	0	0	0	0	NA	0	NA	0	0
2_Neisseria_sicca	0	0	0	0	0	0	0	0	0	0	0	0	0	0	0	0	0	0	0	0	0	0	0	0	0	0	0	0	0	0	0	0	0	0	0	0	0	0	0	0	0	0	0	0	NA	0	NA	0	0
2_Neisseria_elongata	0	0	0	0	0	0	0	0	0	0	0	0	0	0	0	0	0	0	0	0	0	0	0	0	0	0	0	0	0	0	0	0	0	0	0	0	0	0	0	0	0	0	0	0	NA	0	NA	0	0
2_Lautropia_mirabilis	0.75747	0	0	0	0	0	0	0	0	0	0	0	0	0	0	0	0	0.533451	0	0	0	0	0	0	0	0	0	0	0	0	0	0	0	0	0	0	0	0	0	0	0	0	0	0	NA	0	NA	0	0
2_Micrococcus_luteus	0	0	0	0	0	0	0	0	0	0	0	0	0	0	0	0	0	0	0	0	0	0	0	0	0	0	0	0	0	0	0	0	0	0	0	0	0	0	0	0	0	0	0	0	NA	0	NA	0	0
2_Capnocytophaga_sputigena	0	0	0	0	0	0	0	0	0	0	0	0	0	0	0	0	0	0.528687	0.504867	0	0	0	0	0	0	0	0	0	0	0	0	0	0	0	0	0	0	0	0	0	0	0	0	0	NA	0	NA	0	0
2_Streptococcus_sanguinis	0	0	0	0.589789	0	0	0	0	0	0	0	0	0	0	0	0	0	0	0	0.494718	0	0	0	0	0	0	0	0	0	0	0	0	0	0	0	0	0	0	0	0	0	0	0	0	NA	0	NA	0	0
2_Capnocytophaga_gingivalis	0	0	0	0	0	0	0	0	0	0	0	0	0	0	0	0	0	0	0	0	0	0.597531	0	0	0	0	0	0	0	0	0	0	0	0	0	0	0	0	0	0	0	0	0	0	NA	0	NA	0	0
2_Capnocytophaga_leadbetteri	0	0	0	0	0	0	0	0	0	0	0	0	0	0	0	0	0	0	0	0	0	0	0	0.457195	0	0	0	0	0	0	0	0	0	0	0	0	0	0	0	0	0	0	0	0	NA	0	NA	0	0
2_Micrococcus_sp_EYE_162	0	0	0	0	0	0	0	0	0	0	0	0	0	0	0	0	0	0	0	0	0.562858	0	0	0	0	0	0	0	0	0	-0.481596	0	0	0	0	0	0	0	0	0	0	0	0	0	NA	0	NA	0	0
2_Kingella_bonacorsii	0	0	0	0	0	0	0	0	0	0	0.457039	0.529704	0	0	0	0	0	0	0	0	0	0	0	0	0	0	0	0	0	0	0	0.567471	0	0	0	0.625452	0	0	0	0	0	0	0	0	NA	0	NA	0	0
3_Actinomyces_dentalis	0	0	0	0	0	0	0	0	0	0	0	0	0	0	0	0	0	0	0	0	0	0	0	0	0	0	0	0	0	0	0	0	0	0	0	0	0	0	0	0	0	0	0	0	NA	0	NA	0	0
3_Fusobacterium_nucleatum	0	0	-0.541301	-0.532514	0	0	0	0	0	0	0	-0.827321	0	0	0	0	0	-0.583481	0	0	0	-0.461678	0	0	0	0	0	0	0	0	0	0	0	0	0	0	0	0	0	0	0	0	0	0	NA	0	NA	0	0
3_Prevotella_oris	0	0	0	0	0	0	0	0	0	0	0	0	0	0	0	0	0	0	0	0	0	0	0	0	0	0	0	0	0	0	0	0	0	0	0	0	0	0	0	0	0	0	0	0	NA	0	NA	0	0
3_Prevotella_nigrescens	0	0	0	0	0	0	0	0	0	0	0	0	0	0	0	0	0	0	0	0	0	0	0	0	0	0	0	0.475563	0	0	0	0	0	0	0	0	0	0	0	0	0	0	0	0	NA	0	NA	0	0
3_Actinomyces_naeslundii	0	0	0	0	0	0	0	0	0	0	0	0	0	0	0	0	0	0	0	0	0	0	0.46987	0	0	0	0	0	0	0	0	0	0	0	0	0	0	0	0	0	0	0	0	0	NA	0	NA	0	0
3_Prevotella_denticola	0	0	0	0	0	0	0	0	0	0	0	0	0	0	0	0	0	0	0	0	0	0	0	0	0	0	0	0	0	0	0	0	0	0	0	0	0	0	0	0	0	0	0	0	NA	0	NA	0	0
3_Porphyromonas_endodontalis	0	0	0	0	0	0	0	0	0	0	0	0	0	0	0	0	0	0	0	0	0	0	0	0	0	0	0	0	0	0	0	0	0	0	0	0	0	0	0	0	0	0	0	0	NA	0	NA	0	0
3_Alloprevotella_tannerae	0	0	0	0	0	0	0	0	0	0	0	0	0	0	0	0	0	0	0	0	0	0	0	0	0	0	0	0.707205	0	0	0.488101	0	0	0.582028	0	0	0	0	0	0	0	0	0	0	NA	0	NA	0	0
3_Corynebacterium_matruchotii	0	0	0	0	0	0	0	0	0	0	0.472202	0.558386	0	0	0	0	0	0	0	0	-0.57328	0	0	0.475806	0	0	0	0.4631	0	0	0	0.549983	0	0	0	0	0	0	0	0	0	0	0	0	NA	0	NA	0	0
3_Capnocytophaga_SGB2480	0	0	0	0	0	0.517709	0	0	0	0	0	0	0	0	0	0	0	0	0.551616	0	0	0.523988	0	0	0	0	0	0	0	0	0	0	0	0	0	0	0	0	0	0	0	0	0	0	NA	0	NA	0	0
3_Candidatus_Nanosynsacchari_sp_TM7_ANC_38_39_G1_1	0	0	0	0	0	0	0	0	0	0	0	0	0	0	0	0	0	0	0	0	0	0	0	0	0	0	0	0.732773	0	0	0.471711	0	0	0	0.642923	0	0	0	0	0	0	0	0	0	NA	0	NA	0	0
3_Slackia_exigua	0	-0.575638	0	0	0	0	0.487549	0	0.497185	0	0	0	0	0	0	0	0	0	0	0	0	0	0	0	0	0	0	0	0	0	0.613755	0	0.571377	0	0	0	0	0	0	0	0.851344	0	0	0	NA	0	NA	0	0
3_GGB7107_SGB10420	0	0	0	0	0	0	0	0	0	0	0	0	0	0	0	0	0	0	0	0	0	0	0	0	0	0	0	0	0	0	0	0	0	0	0	0	0	0	0	0	0	0	0	0	NA	0	NA	0	0
3_Lancefieldella_rimae	0	-0.639265	0	0	0	0	0	0	0	0	0	0	0	0	0	0	0	0	0	0	0	0	0	0	0	0	0	0	0	0	0.578954	0	0.612501	0	0.685475	0	0	0	0.851344	0	0	0	0	0	NA	0	NA	0	0
3_Parvimonas_micra	0	0	0	0	0	0	0	0	0	0	0	0	0	0	0	0	0	0	0	0	0	0	0	0	0	0	0	0	0	0.552559	0	0	0	0.665478	0.593859	0	0	0	0.502966	0	0.59082	0	0	0	NA	0	NA	0	0
3_Selenomonas_SGB5897	0	-0.537841	0	0	0	0	0	0	0	0	0	0	0	0	0	0	0	0	0	0	-0.597691	0	0	0	0	-0.50956	0	0.650555	0	0	0.596867	0	0.567939	0	0.747964	0	0	0.517486	0.6537	0	0.72642	0	0	0	NA	0	NA	0	0
3_Schaalia_meyeri	0	0	0	0	0	0	0	0	0	0	0	0	0	0	0	0	0	0	0	0	0	0.493331	0	0	0.50056	0	0.543744	0	0	0	0	0.515495	0	0	0	0	0	0	0	0	0	0	0	0	NA	0	NA	0	0
3_Stutzerimonas_stutzeri	NA	NA	NA	NA	NA	NA	NA	NA	NA	NA	NA	NA	NA	NA	NA	NA	NA	NA	NA	NA	NA	NA	NA	NA	NA	NA	NA	NA	NA	NA	NA	NA	NA	NA	NA	NA	NA	NA	NA	NA	NA	NA	NA	NA	0	NA	NA	NA	NA
3_Treponema_SGB69454	0	0	0	0	0	0	0	0	0	0	0	0	0	0	0	0	0	0	0	0	0	0	0	0	0	0	0	0	0	0	0	0	0	0.597611	0	0	0.521128	0	0	0.609704	0	0	0	0	NA	0	NA	0	0
3_Exiguobacterium_alkaliphilum	NA	NA	NA	NA	NA	NA	NA	NA	NA	NA	NA	NA	NA	NA	NA	NA	NA	NA	NA	NA	NA	NA	NA	NA	NA	NA	NA	NA	NA	NA	NA	NA	NA	NA	NA	NA	NA	NA	NA	NA	NA	NA	NA	NA	NA	NA	0	NA	NA
3_Neisseria_SGB9428	0	0	0	0	-0.469783	0	0.475332	0	0	0	0	0	0	0	0	0	0	0	0	0	0	0	0	0	0	0	0	0	0	0	0	0	0	0	0	0	0.507981	0	0	0	0	0	0	0	NA	0	NA	0	0
3_Rothia_SGB49305	0	0	0	0	0	0	0	0	0	0	0.705988	0	0	0	0	0	0.738286	0	0	0	0	0	0	0	0	0	0.589744	0	0	0	0	0	0	0	0	0.530127	0	0	0	0	0	0	0	0	NA	0	NA	0	0
3_Neisseria_sp_oral_taxon_014	0	0	0	0	0	0	0.536616	0	0	0	0	0	0	0	0.556533	0.531196	0	0	0.549711	0	0	0	0	0	0	0	0	0	0	0	0	0	0	0	0	0	0	0	0	0	0	0	0	0	NA	0	NA	0.492023	0
[truncated: 1 more columns]
